# Supplementary material
Source: PubMed Central journal article supplement (PMC9889108)
Supplement: NIHMS1857494-supplement-1.pdf [file NIHMS1857494-supplement-1.pdf]

1  
2  
3  
4  
5  
6  
7  
8  
9  
10  
11  
12  
13  
14  
15  
16  
17  
18  
19  
20  
21  
22  
23  
24

## Supplemental Materials

### Signatures for Viral Infection and Inflammation in the Proximal Olfactory System in Familial Alzheimer's Disease

Andrew N. Bubak<sup>1,‡</sup>, Laetitia Merle<sup>2,3,‡</sup>, Christy S. Niemeyer<sup>1</sup>, B. Dnate' Baxter<sup>2,3</sup>,  
Arianna Gentile Polese<sup>2,3</sup>, Vijay Ramakrishnan<sup>4</sup>, Johana Gomez<sup>5</sup>, Lucia Madrigal<sup>5</sup>,  
Andres Villegas-Lanau<sup>5</sup>, Francisco Lopera<sup>5</sup>, Wendy Macklin<sup>1,2</sup>, Seth Fritze<sup>6</sup>, Maria A.  
Nagel<sup>5,#</sup>, and Diego Restrepo<sup>1,2,#,\*</sup>

<sup>1</sup>Department of Neurology, University of Colorado Anschutz Medical Campus, Aurora,  
CO 80045, USA

<sup>2</sup>Neuroscience Graduate Program, University of Colorado Anschutz Medical Campus,  
Aurora, CO 80045, USA

<sup>3</sup>Department of Cell and Developmental Biology, University of Colorado Anschutz  
Medical Campus, Aurora, CO 80045, USA

<sup>4</sup>Department of Otolaryngology-Head and Neck Surgery, Indiana University School of  
Medicine, Indianapolis, IN 46202, USA

<sup>5</sup>Neuroscience Research Group, University of Antioquia, Medellín, Colombia

<sup>6</sup>Department of Medical Laboratory Sciences, University of Vermont, Burlington, VT

‡Co-first authors

#Senior authors

25  
26  
27  
28  
29  
30  
31  
32  
33  
34  
35  
36  
37  
38  
39  
40  
41  
42  
43  
44

**eNote 1. Annotations regarding the function of proteins in groups A and B of the  
nanoString (Fig. 3Dii)**

#### **nanoString group A proteins: high expression in FAD high myelination OT (Fig. 3Dii)**

The majority of these proteins are involved in demyelination or are axonal proteins.

**Neurofilament light.** Neurofilament light chain (NfL) is a neuronal cytoplasmic protein  
highly expressed in large calibre myelinated axons (Gaetani et al., 2019).

**Fibronectin (FN1).** In toxin-induced lesions undergoing efficient remyelination,  
fibronectin expression was transiently increased within demyelinated areas and  
declined as remyelination proceeded(Stoffels et al., 2013).

**INPP4B.** EAE31 is a locus controlling latency of motor evoked potentials (MEPs) and  
clinical onset of experimental autoimmune encephalomyelitis. By combining congenic  
mapping, *in silico* haplotype analyses, and comparative genomics Lemcke and co-  
workers identified inositol polyphosphate-4-phosphatase, type II (*Inpp4b*) as the  
quantitative trait gene for EAE31(Lemcke et al., 2014).

45  
46  
47  
48  
49  
50  
51  
52  
53  
54  
55  
56  
57  
58  
59  
60  
61  
62  
63  
64  
65  
66  
67  
68  
69  
70  
71  
72  
73  
74  
75  
76  
77  
78  
79  
80  
81  
82  
83  
84  
85  
86  
87  
88

**CD25 (IL2RA).** Depletion of CD4<sup>+</sup>CD25<sup>+</sup> cells *in vivo* facilitated the expansion of PLP reactive cells with production of T helper 1 cytokines in EAE-resistant B10.S mice. Furthermore, anti-CD25 Ab treatment before immunization resulted in EAE induction in these otherwise resistant mice. These data indicate an important role for autoantigen-specific CD4<sup>+</sup>CD25<sup>+</sup> cells in genetic resistance to autoimmunity(Reddy et al., 2004).

**Ubiquitin.** The vast majority of cellular proteins are degraded by the 26S proteasome after their ubiquitination. Belogurov et al. (Belogurov et al., 2014) report that the major component of the myelin multilayered membrane sheath, myelin basic protein (MBP), is hydrolyzed by the 26S proteasome in a ubiquitin-independent manner both *in vitro* and in mammalian cells(Belogurov et al., 2014).

**PD.L2.** Programed death ligand 2. PD-L2 is up-regulated in inflamed endothelial cells, with an intention to inhibit T-cell transmigration through the blood brain barrier(Zhao et al., 2014).

**ICOS.** The inducible costimulatory molecule (ICOS) is expressed on activated T cells and participates in a variety of important immunoregulatory functions. After the induction of experimental allergic encephalomyelitis in SJL mice with proteolipid protein (PLP), brain ICOS mRNA and protein were up-regulated on infiltrating CD3<sup>+</sup> T cells before disease onset.(Rottman et al., 2001)

**CD80.** CD4<sup>+</sup> T Cell Expressed CD80 Regulates Central Nervous System Effector Function and Survival during Experimental Autoimmune Encephalomyelitis(Podojil et al., 2006).

**PD.1 and PD.L1.** The review by Cencioni et al describes the roles of the PD-1/ PDL-1 pathway in cancer and autoimmune diseases, especially in multiple sclerosis, and how manipulating PD-1 can be a therapeutic approach in multiple sclerosis(Cencioni, 2020).

**CD44.** CD44 overexpression is thought to cause inflammation-independent demyelination and dysmyelination(Tuohy et al., 2004).

**Phospho-PRAS40..T246. PRAS40** (Proline-rich AKT1 substrate 1), also known as Akt1S1 and p39, is a 40-42 kDa cytoplasmic phosphoprotein that lacks generally recognized structural motifs. It is widely expressed and is considered to be key regulator of mTORC1 (mTOR plus Raptor and G beta L), a complex through which Akt signals into the cell. Through phosphorylation, mTORC1 activity is upregulated by PRAS40(Bercury et al., 2014).

**Phospho-AKT1..S473.** Involved in the dual function of the PI3K-Akt-mTORC1 axis in myelination of the peripheral nervous system(Figlia et al., 2017).

89 **Phospho-GSK3B.S9.** MAI-dependent phosphorylation and inactivation of GSK3beta  
90 regulate phosphorylation of CRMP4, a cytosolic regulator of myelin inhibition, and its  
91 ability to complex with RhoA(Alabed et al., 2010).  
92

93 **Vimentin.** Increase in tissue stiffness elicited by chronic demyelination of the corpus  
94 callosum is accompanied by astrogliosis, as shown by elevated GFAP and vimentin  
95 staining(Urbanski et al., 2019).  
96

97 **CD68.** This is a marker for macrophages. Myelin loss along with axonal destruction, the  
98 pathological hallmark of metachromatic leukodystrophy is thought to be caused by  
99 critical sulphatide levels in oligodendrocytes and Schwann cells. Immunolabelling with  
100 MBP and CD68 showed a gradient of demyelination from near-intact U-fibres to myelin-  
101 depleted white matter with diffuse macrophage infiltration.(Ponath et al., 2017).  
102

103 **APP.** Data by Truong et al. identified APP and APLP2 as modulators of normal  
104 myelination and demyelination/remyelination conditions. Deletion of APP and APLP2  
105 identifies novel interplays between the BACE1 substrates in the regulation of  
106 myelination(Truong et al., 2019).  
107

108 **Myelin basic protein.** MBP is a protein found in the myelin sheath.  
109

110 **CD45RO.** Dual expression of CD45RA and CD45RO isoforms on myelin basic protein-  
111 specific CD4+ T-cell lines in multiple sclerosis(Qin et al., 1993)  
112

113 **nanoString group B proteins: high expression in FAD low myelination OT (Fig.**  
114 **3Dii)**

115  
116 These proteins are AD markers.  
117

118 **IDE.** Insulin-degrading-enzyme plays a crucial role in the clearance of amyloid-β and  
119 has been proposed as a therapeutical target for Alzheimer's disease(Kurochkin et al.,  
120 2018).  
121

122 **ADAM10.** ADAM10 is involved in the proteolytic processing of the amyloid precursor  
123 protein(Haass et al., 2012). ADAM10 also cleaves the ectodomain of the triggering  
124 receptor expressed on myeloid cells 2 (TREM2), to produce soluble TREM2 (sTREM2),  
125 which has been proposed as a CSF and sera biomarker of neurodegeneration(Yang et  
126 al., 2020).  
127

128  
129 **NRGN.** Neurogranin concentration in cerebrospinal fluid (CSF) is proposed as marker  
130 for synaptic dysfunction in age-related neurodegeneration(Casaletto et al., 2017), and  
131 has been shown to be specifically increased in patients with Alzheimer's  
132 disease(Willemse et al., 2018).  
133

134 **Synaptophysin.** In the TMEV model, only a few large- to medium-sized  
135 synaptophysin/APP-positive bulbs were found in demyelinated areas. In MS patient  
136 tissue samples, the bulbs appeared exclusively at the inflammatory edges of lesions. In  
137 conclusion, our data suggest that synaptophysin as a reliable marker of axonal damage  
138 in the CNS in inflammatory/demyelinating conditions(Gudi et al., 2017).

139

140 **PLCG1.** Phospholipase C, gamma 1 gene mutations and abnormal splicing of PLCγ1  
141 gene has been identified in AD using both high-throughput screening data and a deep  
142 learning-based prediction(Kim et al., 2021).

143

144 **S6.** Ribosomal protein S6

145

146 **Phospho Tuberin T1462.** The control of translation is disturbed in Alzheimer's disease  
147 (AD). Morel et al.(Morel et al., 2009) analyzed the crosslink between the up regulation of  
148 double-stranded RNA-dependent-protein kinase (PKR) and the down regulation of  
149 mammalian target of rapamycin (mTOR) signaling pathways via p53, the protein  
150 Regulated in the Development and DNA damage response 1 (Redd1) and the tuberous  
151 sclerosis complex (TSC2) factors in two beta-amyloid peptide (Aβ) neurotoxicity  
152 models. In SH-SY5Y cells, Aβ<sub>42</sub> induced an increase of P(T451)-PKR and of the  
153 ratio p66/(p66+p53) in nuclei and a physical interaction between these proteins. Redd1  
154 gene levels increased and P(T1462)-TSC2 decreased. These disturbances were earlier  
155 in rat primary neurons with nuclear co-localization of Redd1 and PKR. The PKR gene  
156 silencing in SH-SY5Y cells prevented these alterations. p53, Redd1 and TSC2 could  
157 represent the molecular links between PKR and mTOR in Aβ neurotoxicity. PKR  
158 could be a critical target in a therapeutic program of AD.

159

160 **Tau, Phospho.Tau..S199.** Phosphorylated tau.

161

162 **References for eNote 1**

- 163 Alabed, Y.Z., Pool, M., Ong Tone, S., Sutherland, C., Fournier, A.E., 2010. GSK3 $\beta$   
164 Regulates Myelin-Dependent Axon Outgrowth Inhibition through CRMP4. *The Journal of*  
165 *Neuroscience* 30(16), 5635.
- 166 Belogurov, A., Jr., Kudriaeva, A., Kuzina, E., Smirnov, I., Bobik, T., Ponomarenko, N.,  
167 Kravtsova-Ivantsiv, Y., Ciechanover, A., Gabibov, A., 2014. Multiple Sclerosis  
168 Autoantigen Myelin Basic Protein Escapes Control by Ubiquitination during Proteasomal  
169 Degradation \*. *Journal of Biological Chemistry* 289(25), 17758-17766.
- 170 Bercury, K.K., Dai, J., Sachs, H.H., Ahrendsen, J.T., Wood, T.L., Macklin, W.B., 2014.  
171 Conditional ablation of raptor or rictor has differential impact on oligodendrocyte  
172 differentiation and CNS myelination. *J Neurosci* 34(13), 4466-4480.
- 173 Casaletto, K.B., Elahi, F.M., Bettcher, B.M., Neuhaus, J., Bendlin, B.B., Asthana, S.,  
174 Johnson, S.C., Yaffe, K., Carlsson, C., Blennow, K., Zetterberg, H., Kramer, J.H., 2017.  
175 Neurogranin, a synaptic protein, is associated with memory independent of Alzheimer  
176 biomarkers. *Neurology* 89(17), 1782.
- 177 Cencioni, M.T., 2020. The immune regulation of PD-1/PDL-1 axis, a potential biomarker  
178 in multiple sclerosis. *Neuroimmunology and Neuroinflammation* 7(3), 277-290.
- 179 Figlia, G., Normén, C., Pereira, J.A., Gerber, D., Suter, U., 2017. Dual function of the  
180 PI3K-Akt-mTORC1 axis in myelination of the peripheral nervous system. *eLife* 6, e29241.
- 181 Gaetani, L., Blennow, K., Calabresi, P., Di Filippo, M., Parnetti, L., Zetterberg, H., 2019.  
182 Neurofilament light chain as a biomarker in neurological disorders. *Journal of Neurology,*  
183 *Neurosurgery & Psychiatry* 90(8), 870.
- 184 Gudi, V., Gai, L., Herder, V., Tejedor, L.S., Kipp, M., Amor, S., Sühs, K.-W., Hansmann,  
185 F., Beineke, A., Baumgärtner, W., Stangel, M., Skripuletz, T., 2017. Synaptophysin Is a  
186 Reliable Marker for Axonal Damage. *Journal of Neuropathology & Experimental*  
187 *Neurology* 76(2), 109-125.
- 188 Haass, C., Kaether, C., Thinakaran, G., Sisodia, S., 2012. Trafficking and proteolytic  
189 processing of APP. *Cold Spring Harb Perspect Med* 2(5), a006270.
- 190 Kim, S.-H., Yang, S., Lim, K.-H., Ko, E., Jang, H.-J., Kang, M., Suh, P.-G., Joo, J.-Y.,  
191 2021. Prediction of Alzheimer's disease-specific phospholipase c gamma-1 SNV by deep  
192 learning-based approach for high-throughput screening. *Proceedings of the National*  
193 *Academy of Sciences* 118(3), e2011250118.
- 194 Kurochkin, I.V., Guarnera, E., Berezovsky, I.N., 2018. Insulin-Degrading Enzyme in the  
195 Fight against Alzheimer's Disease. *Trends in Pharmacological Sciences* 39(1), 49-58.
- 196 Lemcke, S., Müller, S., Möller, S., Schillert, A., Ziegler, A., Cepok-Kauffeld, S.,  
197 Comabella, M., Montalban, X., Rüllicke, T., Nandakumar, K.S., Hemmer, B., Holmdahl,

198 R., Pahnke, J., Ibrahim, S.M., 2014. Nerve Conduction Velocity Is Regulated by the  
199 Inositol Polyphosphate-4-Phosphatase II Gene. *The American Journal of Pathology*  
200 184(9), 2420-2429.

201 Morel, M., Couturier, J., Pontcharraud, R., Gil, R., Fauconneau, B., Paccalin, M., Page,  
202 G., 2009. Evidence of molecular links between PKR and mTOR signalling pathways in  
203 A $\beta$  neurotoxicity: Role of p53, Redd1 and TSC2. *Neurobiology of Disease* 36(1), 151-  
204 161.

205 Podojil, J.R., Kohm, A.P., Miller, S.D., 2006. CD4<sup>+</sup> T Cell  
206 Expressed CD80 Regulates Central Nervous System Effector Function and Survival  
207 during Experimental Autoimmune Encephalomyelitis. *The Journal of Immunology* 177(5),  
208 2948.

209 Ponath, G., Ramanan, S., Mubarak, M., Housley, W., Lee, S., Sahinkaya, F.R.,  
210 Vortmeyer, A., Raine, C.S., Pitt, D., 2017. Myelin phagocytosis by astrocytes after myelin  
211 damage promotes lesion pathology. *Brain* 140(2), 399-413.

212 Qin, Y., van den Noort, S., Kurt, J., Gupta, S., 1993. Dual expression of CD45RA and  
213 CD45RO isoforms on myelin basic protein-specific CD4<sup>+</sup> T-cell lines in multiple sclerosis.  
214 *Journal of Clinical Immunology* 13(2), 152-161.

215 Reddy, J., Illes, Z., Zhang, X., Encinas, J., Pyrdol, J., Nicholson, L., Sobel, R.A.,  
216 Wucherpfennig, K.W., Kuchroo, V.K., 2004. Myelin proteolipid protein-specific  
217 CD4<sup>+</sup>CD25<sup>+</sup> regulatory cells mediate  
218 genetic resistance to experimental autoimmune encephalomyelitis. *Proceedings of the*  
219 *National Academy of Sciences of the United States of America* 101(43), 15434.

220 Rottman, J.B., Smith, T., Tonra, J.R., Ganley, K., Bloom, T., Silva, R., Pierce, B.,  
221 Gutierrez-Ramos, J.-C., Özkaynak, E., Coyle, A.J., 2001. The costimulatory molecule  
222 ICOS plays an important role in the immunopathogenesis of EAE. *Nature Immunology*  
223 2(7), 605-611.

224 Stoffels, J.M.J., de Jonge, J.C., Stancic, M., Nomden, A., van Strien, M.E., Ma, D.,  
225 Šišková, Z., Maier, O., French-Constant, C., Franklin, R.J.M., Hoekstra, D., Zhao, C.,  
226 Baron, W., 2013. Fibronectin aggregation in multiple sclerosis lesions impairs  
227 remyelination. *Brain* 136(1), 116-131.

228 Truong, P.H., Ciccotosto, G.D., Merson, T.D., Spoerri, L., Chuei, M.J., Ayers, M., Xing,  
229 Y.L., Emery, B., Cappai, R., 2019. Amyloid precursor protein and amyloid precursor-like  
230 protein 2 have distinct roles in modulating myelination, demyelination, and remyelination  
231 of axons. *Glia* 67(3), 525-538.

232 Tuohy, T.M., Wallingford, N., Liu, Y., Chan, F.H., Rizvi, T., Xing, R., Bebo, B., Rao, M.S.,  
233 Sherman, L.S., 2004. CD44 overexpression by oligodendrocytes: a novel mouse model  
234 of inflammation-independent demyelination and dysmyelination. *Glia* 47(4), 335-345.

- 235 Urbanski, M.M., Brendel, M.B., Melendez-Vasquez, C.V., 2019. Acute and chronic  
236 demyelinated CNS lesions exhibit opposite elastic properties. *Scientific Reports* 9(1), 999.
- 237 Willemse, E.A.J., De Vos, A., Herries, E.M., Andreasson, U., Engelborghs, S., van der  
238 Flier, W.M., Scheltens, P., Crimmins, D., Ladenson, J.H., Vanmechelen, E., Zetterberg,  
239 H., Fagan, A.M., Blennow, K., Bjerke, M., Teunissen, C.E., 2018. Neurogranin as  
240 Cerebrospinal Fluid Biomarker for Alzheimer Disease: An Assay Comparison Study.  
241 *Clinical Chemistry* 64(6), 927-937.
- 242 Yang, J., Fu, Z., Zhang, X., Xiong, M., Meng, L., Zhang, Z., 2020. TREM2 ectodomain  
243 and its soluble form in Alzheimer's disease. *Journal of Neuroinflammation* 17(1), 204.
- 244 Zhao, S., Li, F., Leak, R.K., Chen, J., Hu, X., 2014. Regulation of Neuroinflammation  
245 through Programed Death-1/Programed Death Ligand Signaling in Neurological  
246 Disorders. *Frontiers in Cellular Neuroscience* 8.  
247
- 248

249 **Supplemental Table 1** Antibody Information for Multispectral Immunohistochemistry

| Target            | Concentration | Antigen retrieval conditions                | Vendor                                   | Catalogue number | Host Species |
|-------------------|---------------|---------------------------------------------|------------------------------------------|------------------|--------------|
| Ab                | 1:500         | EDTA ER2<br>pH9                             | Biolegend                                | 803001           | Mouse        |
| Iba1              | 1:10,000      | EDTA ER2<br>pH9                             | Wako                                     | 019-19741        | Rabbit       |
| GFAP              | 1:500         | EDTA ER2<br>pH9                             | Dako/Agilent                             | Z033429-2        | Rabbit       |
| Cleaved Caspase 3 | 1:100         | EDTA ER2<br>pH9                             | Cell Signaling                           | 9664L            | Rabbit       |
| p-Tau             | 1:200         | Citrate ER1<br>pH6                          | Invitrogen                               | MN1020           | Mouse        |
| DCX               | 1:5,000       | Citrate ER1<br>pH6                          | Abcam                                    | ab18723          | Rabbit       |
| CD68              | 1:500         | Citrate ER1<br>pH6                          | Dako/Agilent                             | M0814            | Mouse        |
| PLP               | 1:400         | Citrate AR<br>buffer +<br>TritonX100<br>pH6 | PLP antibody source<br>was <sup>10</sup> |                  | Rat          |

250  
 251 Antigen retrieval was performed on a fully automated immunostainer using either ER1 (citrate with a pH  
 252 range of 5.9-6.1) or ER2 (EDTA with a pH range of 8.9-9.1) buffers, except for PLP which was manually  
 253 processed in the microwave with citrate AR buffer and TritonX100 (pH6).  
 254



255 **Supplemental Table 2** Antibodies Used for nanoString  
256

| <b>Item name</b>                     | <b>Item Number</b> |
|--------------------------------------|--------------------|
| GeoMx Human Protein Core for NGS     | 121300129          |
| GeoMx Immune Cell Typing Assay       | 121300130          |
| GeoMx Immune Activation Status Assay | 121300132          |
| GeoMx Myeloid Assay                  | 121300137          |
| GeoMx PI3K/AKT Signaling Assay       | 121300136          |
| GeoMx Neural Cell Typing Assay       | 121300138          |
| GeoMx Alzheimer's Pathology Assay    | 121300139          |
| GeoMx Glial Cell Subtyping Assay     | 121300143          |

257  
258

259  
260

**Supplemental Table 3** Antibody Information for Immunofluorescence for nanoString

| <b>Antibody ID</b> | <b>Name</b>  | <b>company</b> | <b>clone #</b> | <b>Catalog #</b> | <b>concentration used</b> |
|--------------------|--------------|----------------|----------------|------------------|---------------------------|
| syto13             | syto13       | NanoString     |                | 121300306        | 25                        |
| MF-304             | Beta amyloid | Novus          | MOAB-2         | NBP2-13075AF532  | 1:100                     |
| MF-618             | MBP          | Novus          | 2H9            | NBP2-22121AF594  | 1:100                     |
| MF-643             | Iba1         | millipore      | 20A12.1        | MABN92-AF647     | 1:100                     |

261  
262

263 **Supplemental Table 4.** Excel worksheet with TempO-Seq raw counts and p-values for  
264 all genes for the olfactory bulb (control vs. FAD)

265

266 **Supplemental Table 5.** Excel worksheet with TempO-Seq raw counts and p-values for  
267 all genes for the olfactory tract (control vs. FAD)

268

269 **Supplemental Table 6.** Excel worksheet with genes included in specific pathways by  
270 Insight analysis.

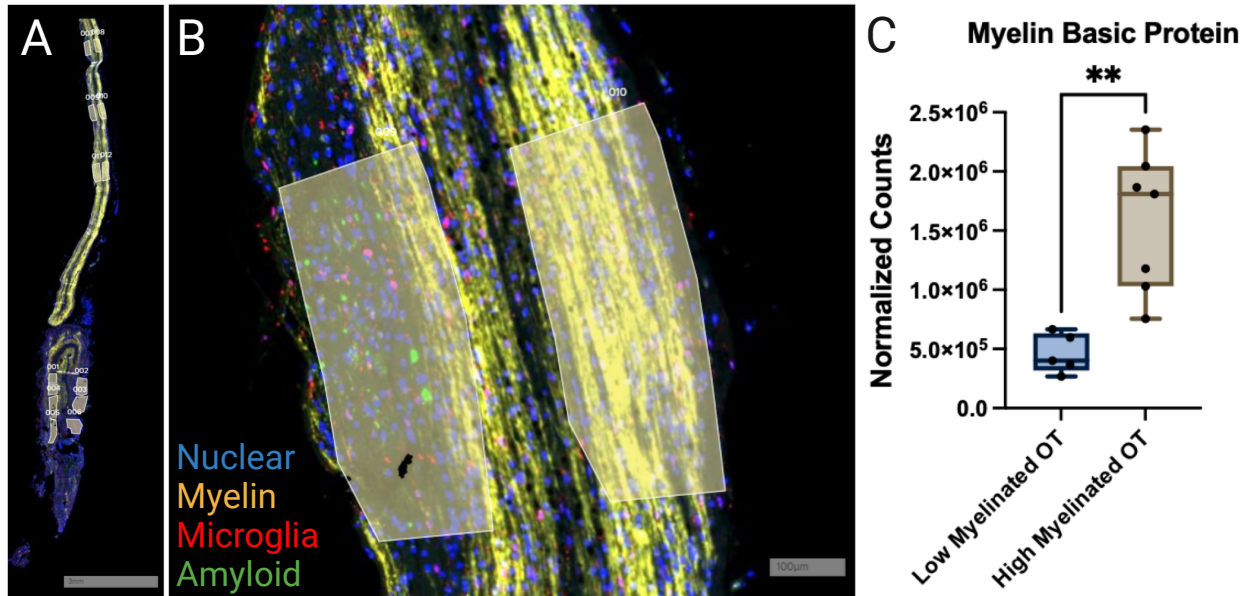

271

272

273 **Supplemental Figure 1.** Quantification of expression of myelin basic protein in the high

274 and low myelinated regions of the OT of FAD subjects using nanoString spatial profiling.

275 (A) A representative horizontal tissue section (FAD 359) of the OB/OT showing regions

276 used for protein quantification. The sections are immunolabeled for myelin basic protein,

277 Iba1, A $\beta$  and nuclear staining (styo13). (B) Closeup of OT areas with high and low

278 myelination. (C) Normalized counts for myelin basic protein in the low and high

279 myelination areas. The difference is statistically significant ( $p < 0.05$ , pairwise t-test).

280

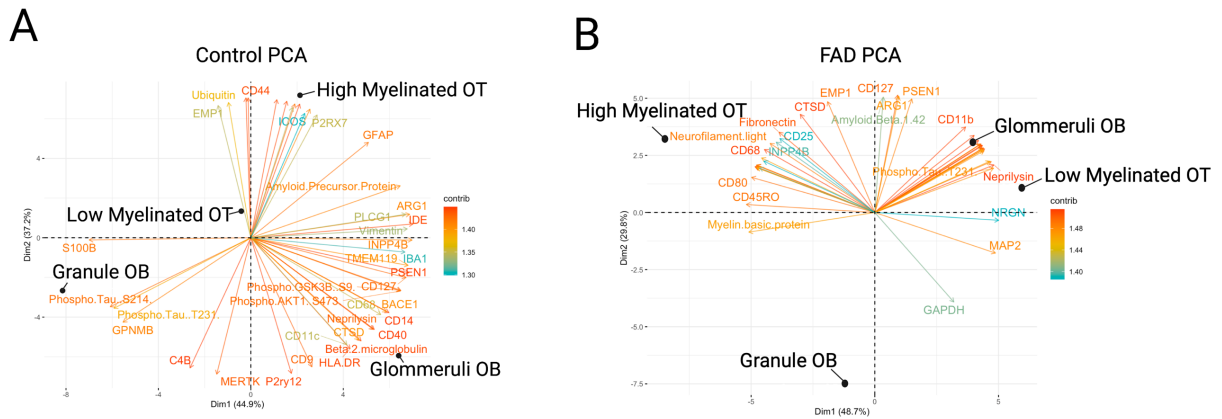

281

282 **Supplemental Figure 2.** Principal component analysis of the proteomic data for the  
283 control and FAD datasets.

284

285 A principal component analysis of nanoString protein expression shows increased  
286 distance between high and low myelinated OT in the FAD tissue. (A) Control. (B) FAD.

287
